# Supplementary material for: Characterisation of the Novel Filamentous Phage PMBT54 Infecting the Milk Spoilage Bacteria Pseudomonas carnis and Pseudomonas lactis
Source: MDPI journal article supplement (doi:10.3390/v15091781), 2023-08-22
Supplement: s1 [file s1]

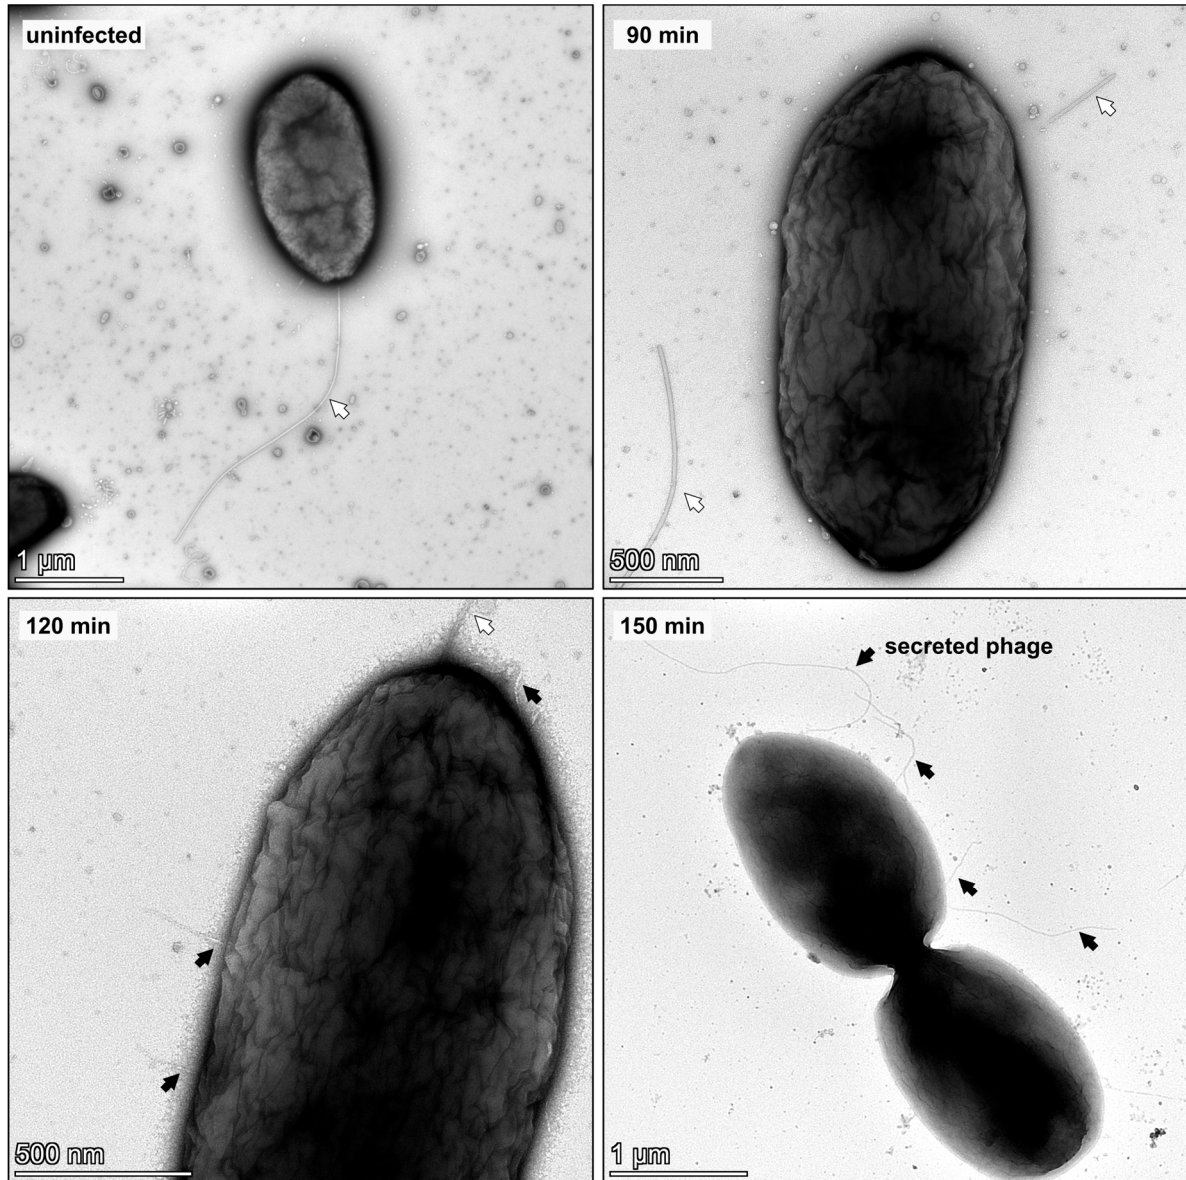

**Figure S1.** Phage secretion from host *Pseudomonas carnis* M132: TEM images of the uninfected host and three timepoints post infection. Bacterial flagella are indicated with white arrows. Black arrows indicate the filamentous phage.

**Table S1.** *Pseudomonas* strains used in this study.

| Strain description                             | Origin                     | Source/ Reference <sup>1,2</sup>                                     |
|------------------------------------------------|----------------------------|----------------------------------------------------------------------|
| <i>P. fluorescens</i> L1-82                    | raw milk                   | TUM isolate                                                          |
| <i>P. fluorescens</i> L1-83                    | raw milk                   | TUM isolate                                                          |
| <i>P. fragi</i> L1-85                          | raw milk                   | TUM isolate                                                          |
| <i>P. gessardii</i> L1-88<br>(DSM 17152)       | mineral water              | Verhille et al. (1999) [47]<br>emend. van den Beld et al.(2016) [48] |
| <i>P. gessardii</i> L1-89                      | raw milk                   | TUM isolate                                                          |
| <i>P. gessardii</i> L1-90                      | milk semifinished product  | TUM isolate                                                          |
| <i>P. lactis</i> L1-91                         | raw milk                   | TUM isolate                                                          |
| <i>P. lactis</i> L1-92                         | raw milk                   | TUM isolate                                                          |
| <i>P. lactis</i> L1-93<br>(DSM 29167)          | raw milk                   | Neubeck et al. (2017) [15]                                           |
| <i>P. lundensis</i> L1-95                      | raw milk                   | TUM isolate                                                          |
| <i>P. lundensis</i> L1-96                      | milk semifinished product  | TUM isolate                                                          |
| <i>P. meridiana</i> L1-98                      | raw milk                   | TUM isolate                                                          |
| <i>P. meridiana</i> L1-99                      | raw milk                   | TUM isolate                                                          |
| <i>P. protegens</i> L1-101                     | raw milk                   | TUM isolate                                                          |
| <i>P. protegens</i> L1-102                     | raw milk                   | TUM isolate                                                          |
| <i>P. proteolytica</i> L1-103<br>(DSM 15321)   | cyanobacterial mat samples | Reddy et al. (2004) [49]<br>emend. van den Beld et al. (2016) [48]   |
| <i>P. proteolytica</i> L1-104                  | raw milk                   | TUM isolate                                                          |
| <i>P. proteolytica</i> L1-105                  | raw milk                   | TUM isolate                                                          |
| <i>P. proteolytica</i> L1-106                  | raw milk                   | TUM isolate                                                          |
| <i>P. proteolytica</i> L1-107                  | cream                      | TUM isolate                                                          |
| <i>P. haemolytica</i> L1-177<br>(DSM 108987)   | raw milk                   | Hofmann et al. (2020) [50]                                           |
| <i>P. iridis</i> L1-222 (M19)                  | raw milk                   | MRI isolate                                                          |
| <i>P. lundensis</i> M47                        | raw milk                   | MRI isolate                                                          |
| <i>P. rustica</i> L1-223 (M59)<br>(DSM 112348) | raw milk                   | Fiedler et al., 2022 [51]                                            |
| <i>P. sp.</i> M70                              | raw milk                   | MRI isolate                                                          |
| <i>P. bubulae</i> M72                          | raw milk                   | MRI isolate                                                          |
| <i>P. carnis</i> M132                          | raw milk                   | MRI isolate                                                          |

<sup>1</sup>TUM: Technical University of Munich. Strains have been isolated within the Industrial Collective Research (IGF) funded project AiF-FV 16588 N.

<sup>2</sup>MRI: Max Rubner-Institut. Strains have been isolated within the Industrial Collective Research (IGF) funded project AiF-FV 20027 N.

**Table S2.** Top 3 Blast hits of assembled contigs. Node 3 was identified as a filamentous phage.

| Description                                                              | Scientific Name       | Common Name | Taxid   | Max Score | Total Score | Query cover | E Value | Per. Ident | Acc. Len | Accession  |
|--------------------------------------------------------------------------|-----------------------|-------------|---------|-----------|-------------|-------------|---------|------------|----------|------------|
| NODE_1                                                                   |                       |             |         |           |             |             |         |            |          |            |
| <i>Pseudomonas monteilii</i> STW0522-72 plasmid pSTW0522-72-3 DNA,...    | <i>Pseudomonas</i>    | NA          | 76759   | 45142     | 69238       | 75%         | 0       | 99         | 44219    | AP022476.1 |
| <i>Pseudomonas putida</i> strain IEC33019 plasmid pIEC33019, complete... | <i>Pseudomonas</i>    | NA          | 303     | 42125     | 76004       | 82%         | 0       | 99,3       | 52710    | CP016446.1 |
| <i>Pseudomonas mendocina</i> strain AOUC-01/15 plasmid pMEN15, comple.   | <i>Pseudomonas</i>    | NA          | 300     | 36221     | 71110       | 75%         | 0       | 100        | 55387    | MK671727.1 |
| NODE_2                                                                   |                       |             |         |           |             |             |         |            |          |            |
| <i>Pseudomonas fragi</i> strain NMC25 plasmid unnamed2, complete...      | <i>Pseudomonas</i>    | NA          | 296     | 13682     | 36520       | 68%         | 0       | 87,9       | 54359    | CP021134.1 |
| <i>Pseudomonas migulae</i> strain R1-9 plasmid unnamed, complete...      | <i>Pseudomonas</i>    | NA          | 78543   | 9768      | 35396       | 68%         | 0       | 87,3       | 68338    | CP043572.1 |
| <i>Pseudomonas mandelii</i> JR-1 plasmid, complete sequence              | <i>Pseudomonas</i>    | NA          | 1147786 | 6482      | 7250        | 9%          | 0       | 100        | 410512   | CP005961.1 |
| NODE_3 (=PMBT54)                                                         |                       |             |         |           |             |             |         |            |          |            |
| <i>Inoviridae</i> sp. isolate ctbd3, complete genome                     | <i>Inoviridae</i> sp. | NA          | 2219103 | 11537     | 12845       | 100%        | 0       | 97,9       | 7321     | MH616883.1 |
| <i>Pseudomonas tolaasii</i> strain 2192T chromosome                      | <i>Pseudomonas</i>    | NA          | 29442   | 65,8      | 65,8        | 4%          | 0,0001  | 70,7       | 6856683  | CP020369.1 |
| <i>Pseudomonas aeruginosa</i> strain PAAK095 chromosome, complete genome | <i>Pseudomonas</i>    | NA          | 287     | 60,2      | 120         | 1%          | 0,006   | 79,6       | 6780782  | CP054473.1 |
| NODE_7                                                                   |                       |             |         |           |             |             |         |            |          |            |
| Uncultured prokaryote from Rat gut metagenome metamobilome,...           | uncultured p..        | NA          | 198431  | 1657      | 2711        | 55%         | 0       | 93,8       | 4028     | LN853216.1 |
| <i>Pseudomonas aeruginosa</i> strain YTSY4 plasmid pYTSY4-VIM, comple... | <i>Pseudomonas</i>    | NA          | 287     | 1530      | 2738        | 59%         | 0       | 91,2       | 14870    | MT313930.1 |
| Uncultured prokaryote from Rat gut metagenome metamobilome,...           | uncultured p..        | NA          | 198431  | 1391      | 1391        | 35%         | 0       | 88         | 2394     | LN854271.1 |

**Table S3. HMM alignments of the predicted ORFs against the databases UniProt, Pfam and PDB using HHsuite.** Best hit and corresponding database is indicated next to the ORF number. Below are alignment statistics for each hit.

[illegible]

```
ORF2, DB = PDB
>3VEA A Macrodomein Ter protein/DNA complex; macrodomains, chromosome, DNA condensation, DNA; 2.55A {Yersinia pestis}
Probab=92.51 E-value=0.045 Score=37.40 Aligned_cols=37 Identities=24% Similarity=0.424 Sum_probs=33.7
Template_Neff=6.100
```

ORF3, DB = PDB, Pfam, UniProt  
no significant results

ORF5, DB = PDB  
>1PFS\_B PF3 SINGLE-STRANDED DNA BINDING PROTEIN; DNA-BINDING PROTEIN, VIRAL, BACTERIOPHAGE PF3; NMR {Pseudomonas phage PF3} SCOP: b.40.4.7  
Probab=98.29 E-value=1.8e-09 Score=69.05 Aligned\_cols=75 Identities=27% Similarity=0.515 Sum\_probs=71.2  
Template\_Neff=6.500

|             |    |   |    |      |
|-------------|----|---|----|------|
| Q ORF5      | 87 | A | 87 | (94) |
| Q Consensus | 87 | a | 87 | (94) |
|             |    | . |    |      |
| T Consensus | 77 | ~ | 77 | (78) |
| T 1PFS_B    | 77 | R | 77 | (78) |
| T ss_dssp   |    | E |    |      |
| T ss_pred   |    | c |    |      |
| Confidence  |    | 4 |    |      |

[illegible]

|                  |    |                                                          |    |      |
|------------------|----|----------------------------------------------------------|----|------|
| Q ORF7           | 29 | AAKWDTYTQITTTGVDFSGIATGVLVSAAVLAGIYAGIKGARIVLGLF         | 74 | (76) |
| Q Consensus      | 29 | aakwdytqtittgvdfsgiatgvlsvaavlagiyagikgarivlglf          | 74 | (76) |
|                  |    | +.-+ +-.+...+..+ +.-+..+..+...+...+...+...+.. +.-+...+.. |    |      |
| T Consensus      | 13 | a-a-d-t-v-t-I-----iG-av1-v-v-i-----k-vrr~                | 56 | (56) |
| T 13CK69_9GAMM/1 | 13 | vanITVTDIVDQLK--AGAPAIIVSITAATISLLAVIAVFKYVRGAL          | 56 | (56) |
| T ss_pred        |    | hhccCHHHHHHHHHH--hhHHHHHHHHHHHHHHHHHHHHHHHHHHhhc         |    |      |
| Confidence       |    | 344566777877665 67777888888888888888999999988876653      |    |      |

[illegible]

|                  |     |                                                                                                                          |     |       |
|------------------|-----|--------------------------------------------------------------------------------------------------------------------------|-----|-------|
| Q ORF8           | 317 | GSTGGTGdgetPgtGTGGGqgggGTGTGGSGnGSsgSSPGTgSGSgSSgSSGSSGEGDgSGSGdGLGSfESFPgdLTLS                                          | 396 | (483) |
| Q Consensus      | 317 | --gg-g--g--g--g--g--g--g--g--g--g--g--g--g--f-----<br>++.[.]++...[++++].[+..+++++++][+.].[+]++[++++].[[+]].[-.+].[+].[.] | 396 | (483) |
| T Consensus      | 162 | gstgtgdgetpgtGttgggggggTgtggsgmgngssgspptGsgsgssgggsagsggedgsgsdglgfesapgdltls                                           | 241 | (328) |
| T UniRef100 A0A3 | 162 | GSTGGTGdgetPgtGTGGGqgggGTGTGGSGnGSsgSSPGTgSGSgSSgSSGSSGEGDgSGSGdGLGSfESFPgdLTLS                                          | 241 | (328) |

[illegible]

[illegible]

**Table S4.** Python script used to extract coding sequences from GenBank files and saving them as Fasta (.faa) files.

[illegible]
